# Supplementary material for: Baseline Mapping of Schistosomiasis and Soil Transmitted Helminthiasis in the Northern and Eastern Health Regions of Gabon, Central Africa:&nbsp; Recommendations for Preventive Chemotherapy
Source: Preprints.org preprint supplement (doi:10.20944/preprints201808.0442.v1), 2018-08-27
Supplement: Supplementary file 1 [file supplementary]

S1 Table

| Region | Department | School | School name                                         | GPS point                 |
|--------|------------|--------|-----------------------------------------------------|---------------------------|
| Nord   | Woleu      | 1      | <b>Ecole Provinciale d'Oyem</b>                     | 01.59967°N<br>011.56645°E |
|        |            | 2      | <b><i>Ecole Privée Protestante André Mintsa</i></b> | 01.59049°N<br>011.57013°E |
|        |            | 3      | <b><i>Ecole Privée Catholique St Eloi</i></b>       | 01.61000°N<br>011.57861°E |
|        |            | 4      | <b><i>Ecole Privée Catholique St Macaire</i></b>    | 01.61189°N<br>011.57761°E |
|        |            | 5      | <b>Ecole Publique Communale de Methui</b>           | 01.60977°N<br>011.58814°E |
|        | Ntem       | 1      | Ecole Publique Rurale de Konoville                  | 01.84280°N<br>011.64474°E |
|        |            | 2      | <b><i>Ecole Privée Protestante D'Awoua</i></b>      | 01.87748°N<br>011.66107°E |
|        |            | 3      | Ecole Publique Rurale d'Akam-Effak                  | 01.93242°N<br>011.58912°E |
|        |            | 4      | <b>Ecole Publique Communale de Bitam Centre</b>     | 02.07847°N<br>011.49518°E |
|        |            | 5      | <b>Ecole Publique Communale d'Agnizok</b>           | 02.08226°N<br>011.48370°E |
|        | Haut Ntem  | 1      | <b>Ecole Communale B (Ngone)</b>                    | 02.13607°N<br>012.14867°E |
|        |            | 2      | <b>Ecole Communale A</b>                            | 02.15187°N<br>012.13923°E |
|        |            | 3      | <b>Ecole Communale C (Ngame)</b>                    | 02.14739°N<br>012.13128°E |
|        |            | 4      | <b><i>Ecole Privée Protestante d'Ebomane</i></b>    | 02.16718°N                |

|            |   |                                                         |             |
|------------|---|---------------------------------------------------------|-------------|
|            |   |                                                         | 012.06080°E |
|            |   |                                                         | 02.15608°N  |
|            | 5 | <i>Ecole Privée Catholique d'Alep</i>                   | 012.08179°E |
|            |   |                                                         | 01.01097°N  |
|            | 1 | <b>Ecole Communale Publique de Medouneu</b>             | 010.79521°E |
|            |   |                                                         | 01.01779°N  |
|            | 2 | <i>Ecole Privée Catholique St J Batiste</i>             | 010.80172°E |
| Haut Komo  | 3 | <i>Ecole Privée Catholique de NkomeMbe</i>              | 00.99733°N  |
|            |   |                                                         | 010.71691°E |
|            | 4 | Ecole Publique de Nkinen'n                              | 00.96235°N  |
|            |   |                                                         | 010.6855°E  |
|            | 5 | Ecole Publique de Komo Aviation                         | 01.00371°N  |
|            |   |                                                         | 010.76233°E |
|            |   |                                                         | 00.78262°N  |
|            | 1 | <b>Ecole Publique Communale de Mitzi Centre</b>         | 011.54924°E |
|            |   |                                                         | 00.79213°N  |
|            | 2 | <i>Ecole Privée Catholique St Joseph</i>                | 011.55108°E |
| Okano      | 3 | <i>Ecole Privée Protestante de Mitzi Centre</i>         | 00.78497°N  |
|            |   |                                                         | 011.54987°E |
|            | 4 | Ecole Publique Rurale de Doumandzou                     | 00.95037°N  |
|            |   |                                                         | 011.15754E  |
|            | 5 | Ecole Publique de MinkoMibè                             | 00.86721°N  |
|            |   |                                                         | 011.58973°E |
|            |   |                                                         | 00.56826°N  |
|            | 1 | <i>Ecole Privée Catholique Notre Dame des Victoires</i> | 012.85146°E |
| Est Ivindo | 2 | <b>Ecole Publique de MboloEdock</b>                     | 00.55421°N  |
|            |   |                                                         | 012.85069°E |
|            | 3 | <b>Ecole Publique Communale de Loaloe</b>               | 00.52809°N  |
|            |   |                                                         | 012.82878°E |

|       |   |                                                             |                           |
|-------|---|-------------------------------------------------------------|---------------------------|
|       | 4 | Ecole Publique de Mohoba-Mozeve                             | 00.31776°N<br>013.22416°E |
|       | 5 | <i>Ecole Privée Protestante de Mbess</i>                    | 00.57652°N<br>012.68767°E |
|       | 1 | Ecole publique rurale de Djidji                             | 00.23061°N<br>011.79161°E |
|       | 2 | <b><i>Ecole Saint Marcel de Massoukou</i></b>               | 00.07734°S<br>011.94719°E |
|       | 3 | <b>Ecole Publique de Tsong-Bial</b>                         | 00.11018°S<br>011.94016°E |
| Lopé  | 4 | <b>Ecole Publique Communale de Booué Centre</b>             | 00.09289°S<br>011.94747°E |
|       | 5 | Ecole Publique de Petit Okano (Abénéland)                   | 00.04751°S<br>011.87439E  |
|       | 1 | <b>Ecole Publique Communale d'Ovan</b>                      | 00.31258°N<br>012.17812°E |
|       | 2 | <b><i>Ecole Privée protestante d'Ovan</i></b>               | 00.30760°N<br>012.18476°E |
|       | 3 | <b><i>Ecole Communale Privée Protestante de Kombani</i></b> | 00.32602°N<br>012.19575°E |
| Mvoun | 4 | Ecole Publique de Mintoum                                   | 00.41891°N<br>012.26924°E |
|       | 5 | Ecole Publique de Koumameyong                               | 00.21880°N<br>011.87133°E |
|       | 1 | <b>Ecole Publique Communale B de Mékambo</b>                | 00.99936°N<br>013.95943°E |
|       | 2 | <b><i>Ecole Privée protestante de Mékambo</i></b>           | 01.01200°N<br>013.94155°E |
|       | 3 | <b><i>Ecole P. Catholique Notre Dame des Rosaires</i></b>   | 01.00863°N                |

---

|   |                                         |             |
|---|-----------------------------------------|-------------|
|   |                                         | 013.96477°E |
|   |                                         | 01.03461°N  |
| 4 | <i>Ecole Privée Catholique d'Imbong</i> | 013.99459°E |
|   |                                         | 00.90206°N  |
| 5 | Ecole Publique Rurale de Malassa        | 014.04312°E |

---
