# Supplementary material for: Baseline Mapping of Schistosomiasis and Soil Transmitted Helminthiasis in the Northern and Eastern Health Regions of Gabon, Central Africa:&nbsp; Recommendations for Preventive Chemotherapy
Source: Preprints.org preprint supplement (doi:10.20944/preprints201808.0442.v1), 2018-08-27
Supplement: Supplementary file 2 [file supplementary]

S2 Table

| Department  | School       | N          | Schistosomiasis       |                   |                      |                | Soil-Transmitted-Helminthiasis          |                                |                                            |                                          | SCH-STH                                  |
|-------------|--------------|------------|-----------------------|-------------------|----------------------|----------------|-----------------------------------------|--------------------------------|--------------------------------------------|------------------------------------------|------------------------------------------|
|             |              |            | <i>S. haematobium</i> | <i>S. mansoni</i> | <i>S. guineensis</i> | SCH            | <i>A. lumbricoides</i>                  | <i>T. trichiura</i>            | Hookworm                                   | STH                                      |                                          |
| Woleu (WLE) | 1            | 50         | 0 (0.0)               | 0 (0.0)           | 0 (0.0)              | 0 (0)          | 8 (16.0)                                | 22 (44.0)                      | 3 (6.0)                                    | 24 (48.0)                                | 24 (48.0)                                |
|             | 2            | 50         | 1 (2.0)               | 0 (0.0)           | 0 (0.0)              | 1 (2.0)        | 12 (24.0) *3-4                          | 20 (40.0)                      | 1 (2.0) *5                                 | 25 (50.0) *3                             | 26 (52.0) *3                             |
|             | 3            | 49         | 0 (0.0)               | 0 (0.0)           | 0 (0.0)              | 0 (0)          | 3 (6.1) *2                              | 14 (28.6) *5                   | 0 (0.0) *5                                 | 14 (28.6) *2-5                           | 14 (28.6) *2-5                           |
|             | 4            | 50         | 0 (0.0)               | 0 (0.0)           | 0 (0.0)              | 0 (0)          | 3 (6.0) *2                              | 16 (32.0) *5                   | 4 (8.0)                                    | 17 (34.0) *5                             | 17 (34.0) *5                             |
|             | 5            | 49         | 1 (2.0)               | 0 (0.0)           | 0 (0.0)              | 1 (2.0)        | 6 (12.2)                                | 29 (59.2) *3-4                 | 7 (14.3) *2-3                              | 30 (61.2) *3-4                           | 30 (61.2) *3-4                           |
|             | <b>Total</b> | <b>248</b> | <b>2 (0.8)</b>        | <b>0 (0)</b>      | <b>0 (0)</b>         | <b>2 (0.8)</b> | <b>32 (12.9)</b><br><b>*NTM-HNT-HKO</b> | <b>101 (40.7) *NTM-HNT-HKO</b> | <b>15 (6.0)</b><br><b>*NTM-HNT-HKO-OKO</b> | <b>110 (44.4)</b><br><b>*NTM-HNT-HKO</b> | <b>111 (44.8)</b><br><b>*NTM-HNT-HKO</b> |
|             | F            | 124        | 1 (0.8)               | 0 (0.0)           | 0 (0.0)              | 1 (0.8)        | 12 (9.7)                                | 49 (39.5)                      | 3 (2.4) *                                  | 51 (41.1)                                | 51 (41.1)                                |
|             | M            | 124        | 1 (0.8)               | 0 (0.0)           | 0 (0.0)              | 1 (0.8)        | 20 (16.1)                               | 52 (41.9)                      | 12 (9.7)                                   | 59 (47.6)                                | 60 (48.4)                                |
|             |              |            |                       |                   |                      |                |                                         |                                |                                            |                                          |                                          |
| Ntem (NTM)  | 1            | 25         | 0 (0.0)               | 0 (0.0)           | 0 (0.0)              | 0 (0)          | 16 (64.0) *4-5                          | 19 (76.0) *4-5                 | 0 (0.0)                                    | 20 (80.0) *4-5                           | 20 (80.0) *4-5                           |
|             | 2            | 17         | 0 (0.0)               | 0 (0.0)           | 0 (0.0)              | 0 (0)          | 7 (41.2) *4                             | 15 (88.2) *4-5                 | 0 (0.0)                                    | 15 (88.2) *4-5                           | 15 (88.2) *4-5                           |
|             | 3            | 14         | 0 (0.0)               | 0 (0.0)           | 0 (0.0)              | 0 (0)          | 5 (35.7)                                | 11 (78.6) *4                   | 1 (7.1)                                    | 13 (92.9) *4-5                           | 13 (92.9) *4-5                           |
|             | 4            | 124        | 3 (2.4)               | 1 (0.8)           | 0 (0.0)              | 3 (2.4)        | 22 (17.7) *1-2                          | 54 (43.5) *1-2-3               | 1 (0.8)                                    | 61 (49.2)                                | 62 (50.0) *1-2-3                         |
|             | 5            | 69         | 3 (4.3)               | 0 (0.0)           | 0 (0.0)              | 3 (4.3)        | 20 (29.0) *1                            | 34 (49.3) *1-2                 | 1 (1.4)                                    | 36 (52.2)                                | 38 (55.1) *1-2-3                         |

|                    |              |            |                |                |                |                |                                          |                                    |                               |                                       |                                       |
|--------------------|--------------|------------|----------------|----------------|----------------|----------------|------------------------------------------|------------------------------------|-------------------------------|---------------------------------------|---------------------------------------|
|                    | <b>Total</b> | <b>249</b> | <b>6 (2.4)</b> | <b>1 (0.4)</b> | <b>0 (0.0)</b> | <b>6 (2.4)</b> | <b>70 (28.1)</b><br><b>* HNT-HKO-OKO</b> | <b>133 (53.4) *HKO</b>             | <b>3 (1.2)</b>                | <b>145 (58.2) *</b><br><b>HKO-OKO</b> | <b>148 (59.4) *</b><br><b>HKO-OKO</b> |
|                    | F            | 125        | 4 (3.2)        | 0 (0.0)        | 0 (0.0)        | 4 (3.2)        | 33 (26.4)                                | 63 (50.4)                          | 1 (0.8)                       | 65 (52.0)                             | 69(55.2)                              |
|                    | M            | 124        | 2 (1.6)        | 1 (0.8)        | 0 (0.0)        | 2 (1.6)        | 37 (29.8)                                | 70 (56.5)                          | 2 (1.6)                       | 80 (64.5)                             | 79 (63.7)                             |
| Haut-Ntem<br>(HNT) | 1            | 45         | 1 (2.2)        | 0 (0.0)        | 0 (0.0)        | 1 (2.2)        | 23 (51.1) *3                             | 30 (66.7) *3                       | 0 (0.0)                       | 32 (71.1) *3                          | 32 (71.1) *3                          |
|                    | 2            | 74         | 0 (0.0)        | 0 (0.0)        | 0 (0.0)        | 0 (0)          | 33 (44.6) *3                             | 45 (60.8) *3                       | 2 (2.7)                       | 55 (74.3) *3                          | 55 (74.3) *3                          |
|                    | 3            | 68         | 1 (1.5)        | 0 (0.0)        | 0 (0.0)        | 1 (1.5)        | 18 (26.5) *1-2                           | 29 (42.6) *1-2-4                   | 0 (0.0)                       | 30 (44.2) *4                          | 30 (44.2) *4                          |
|                    | 4            | 43         | 0 (0.0)        | 0 (0.0)        | 0 (0.0)        | 0 (0)          | 18 (41.9)                                | 28 (65.1) *3                       | 0 (0.0)                       | 33 (76.7)                             | 33 (76.7)                             |
|                    | 5            | 30         | 0 (0.0)        | 0 (0.0)        | 0 (0.0)        | 0 (0)          | 12 (40.0)                                | 19 (63.3)                          | 0 (0.0)                       | 20 (66.7)                             | 20 (66.7)                             |
|                    | <b>Total</b> | <b>260</b> | <b>2 (0.8)</b> | <b>0 (0.0)</b> | <b>0 (0.0)</b> | <b>2 (0.8)</b> | <b>104 (40.0) *OKO</b>                   | <b>151 (58.1) *HKO-OKO</b>         | <b>2 (0.8)</b>                | <b>170 (65.4)</b><br><b>*OKO</b>      | <b>170 (65.4)</b><br><b>*OKO</b>      |
|                    | F            | 137        | 1 (0.7)        | 0 (0.0)        | 0 (0.0)        | 1 (0.7)        | 46 (33.6) *                              | 74 (54.0)                          | 1 (0.7)                       | 82 (59.9)                             | 82 (59.9)                             |
|                    | M            | 123        | 1 (0.8)        | 0 (0.0)        | 0 (0.0)        | 1 (0.7)        | 58 (47.2)                                | 77 (62.6)                          | 1 (0.8)                       | 88 (71.5)                             | 88 (71.5)                             |
| Haut-Komo<br>(HKO) | 1            | 99         | 2 (2.0)        | 0 (0.0)        | 1 (1.0)        | 3 (3.0)        | 45 (45.5) *2-5                           | 62 (62.6) *4                       | 0 (0.0)                       | 67 (67.7) *4-5                        | 68 (68.7) *4-5                        |
|                    | 2            | 60         | 2 (3.3)        | 0 (0.0)        | 0 (0.0)        | 2 (3.3)        | 16 (26.7) *1-4-5                         | 30 (50.0) *3-4-5                   | 0 (0.0)                       | 36 (60.0) *3-4-5                      | 36 (60.0) *3-4-5                      |
|                    | 3            | 16         | 0 (0.0)        | 0 (0.0)        | 0 (0.0)        | 0 (0)          | 8 (50.0)                                 | 14 (87.5) *2                       | 0 (0.0)                       | 14 (87.5)                             | 14 (87.5)                             |
|                    | 4            | 26         | 0 (0.0)        | 0 (0.0)        | 0 (0.0)        | 0 (0)          | 15 (57.7) *2                             | 24 (92.3) *1-2                     | 0 (0.0)                       | 24 (92.3)                             | 24 (92.3)                             |
|                    | 5            | 30         | 1 (3.3)        | 0 (0.0)        | 0 (0.0)        | 1 (3.3)        | 22 (73.3) *1-2                           | 26 (86.7) *1-2                     | 0 (0.0)                       | 28 (93.3)                             | 28 (93.3)                             |
|                    | <b>Total</b> | <b>231</b> | <b>5 (2.2)</b> | <b>0 (0.0)</b> | <b>1 (0.4)</b> | <b>6 (2.6)</b> | <b>106 (45.9) *WLE-NTM-OKO</b>           | <b>156 (67.5) *WLE-NTM-HNT-OKO</b> | <b>0 (0.0)</b><br><b>*WLE</b> | <b>169 (73.2)</b><br><b>*OKO</b>      | <b>170 (73.6)</b><br><b>* OKO</b>     |

|                 |              |            |                               |                |                |                                |                       |                   |                |                                  |                                  |
|-----------------|--------------|------------|-------------------------------|----------------|----------------|--------------------------------|-----------------------|-------------------|----------------|----------------------------------|----------------------------------|
|                 | F            | 122        | 1 (0.8)                       | 0 (0.0)        | 1 (0.8)        | 2 (1.6)                        | 60 (49.2)             | 88 (72.1)         | 0 (0.0)        | 96 (78.7)                        | 96 (78.7)                        |
|                 | M            | 109        | 4 (3.7)                       | 0 (0.0)        | 0 (0.0)        | 4 (3.7)                        | 46 (42.2)             | 68 (62.4)         | 0 (0.0)        | 73 (67.0)                        | 74 (67.9)                        |
| Okano<br>(OKO)  | 1            | 104        | 1 (1.0)                       | 0 (0.0)        | 0 (0.0)        | 1 (1.0)                        | 16 (15.4) *4          | 53 (51.0)         | 0 (0.0)        | 59 (56.7) *3-4                   | 59 (56.7) *3-4                   |
|                 | 2            | 52         | 0 (0.0)                       | 0 (0.0)        | 0 (0.0)        | 0 (0)                          | 12 (23.1) *4          | 22 (42.3) *4      | 0 (0.0)        | 24 (46.2) *4                     | 24 (46.2) *4                     |
|                 | 3            | 50         | 0 (0.0)                       | 0 (0.0)        | 0 (0.0)        | 0 (0)                          | 6 (12.0) *4           | 17 (34.0) *4      | 0 (0.0)        | 18 (36.0) *4                     | 18 (36.0) *1-4                   |
|                 | 4            | 16         | 1 (6.3)                       | 0 (0.0)        | 0 (0.0)        | 1 (6.3)                        | 10 (62.5) *1-2-3-5    | 12 (75.0) *2-3-5  | 0 (0.0)        | 14 (87.5) *5                     | 14 (87.5) *5                     |
|                 | 5            | 26         | 1 (3.9)                       | 0 (0.0)        | 0 (0.0)        | 1 (3.9)                        | 4 (15.4) *4           | 8 (30.8) *4       | 0 (0.0)        | 9 (34.6)                         | 9 (34.6)                         |
|                 | <b>Total</b> | <b>248</b> | <b>3 (1.2)</b>                | <b>0 (0.0)</b> | <b>0 (0.0)</b> | <b>3 (1.2)</b>                 | <b>48 (19.4)</b>      | <b>112 (45.2)</b> | <b>0 (0.0)</b> | <b>124 (50.0)</b>                | <b>124 (50.0)</b>                |
|                 | F            | 124        | 1 (0.8)                       | 0 (0.0)        | 0 (0.0)        | 1 (0.8)                        | 18 (14.5)             | 55 (44.4)         | 0 (0.0)        | 59 (47.6)                        | 59 (47.6)                        |
|                 | M            | 124        | 2 (1.6)                       | 0 (0.0)        | 0 (0.0)        | 2 (1.6)                        | 30 (24.2)             | 57 (46.0)         | 0 (0.0)        | 65 (52.4)                        | 65 (52.4)                        |
| Ivindo<br>(IVD) | 01           | 75         | 1 (1.3)                       | 0 (0.0)        | 0 (0.0)        | 1 (1.3)                        | 9 (12.0) *3-4         | 14 (18.7) *3-4    | 0 (0.0)        | 17 (22.7) *3-4                   | 17 (22.7) *3-4                   |
|                 | 02           | 70         | 0 (0.0)                       | 0 (0.0)        | 0 (0.0)        | 0 (0.0)                        | 18 (25.7) *3-4        | 16 (22.9) *3-4    | 1 (1.4)        | 26 (37.1) *3-4                   | 26 (37.1) *3-4                   |
|                 | 03           | 34         | 1 (2.9)                       | 0 (0.0)        | 0 (0.0)        | 1 (2.9)                        | 23 (67.6) *5          | 19 (55.9) *1-2-5  | 0 (0.0)        | 26 (76.5)*5                      | 27 (79.4) *5                     |
|                 | 04           | 51         | 0 (0.0)                       | 0 (0.0)        | 0 (0.0)        | 0 (0.0)                        | 40 (78.4) *5          | 31 (60.8) *1-2-5  | 0 (0.0)        | 45 (88.2)*5                      | 45 (88.2) *5                     |
|                 | 05           | 25         | 0 (0.0)                       | 0 (0.0)        | 0 (0.0)        | 0 (0.0)                        | 7 (28.0)              | 3 (12.0) *3-4     | 1 (4.0)        | 8 (32.0)                         | 8 (32.0)                         |
|                 | <b>Total</b> | <b>255</b> | <b>2 (0.8)</b><br><b>*MVG</b> | <b>0 (0.0)</b> | <b>0 (0.0)</b> | <b>2 (0.8) *</b><br><b>MVG</b> | <b>97 (38.0) *ZAD</b> | <b>83 (32.5)</b>  | <b>2 (0.8)</b> | <b>122 (47.8)</b><br><b>*ZAD</b> | <b>123 (48.2)</b><br><b>*ZAD</b> |
|                 | F            | 113        | 1 (0.9)                       | 0 (0.0)        | 0 (0.0)        | 1 (0.9)                        | 37 (32.7)             | 32 (28.3)         | 0 (0.0)        | 52 (46.0)                        | 52 (46.0)                        |
|                 | M            | 142        | 1 (0.7)                       | 0 (0.0)        | 0 (0.0)        | 1 (0.7)                        | 60 (42.3)             | 51 (35.9)         | 2 (1.4)        | 70 (49.3)                        | 71 (50.0)                        |

|                                            |              |            |                     |                |                |                      |                       |                       |                     |                        |                        |
|--------------------------------------------|--------------|------------|---------------------|----------------|----------------|----------------------|-----------------------|-----------------------|---------------------|------------------------|------------------------|
| Lopé<br><br><br><br><br><br><br><br>LPE)   | 01           | 47         | 2 (4.3)             | 0 (0.0)        | 0 (0.0)        | 2 (4.3)              | 32 (68.1) *2-3-4-5    | 16 (34.0) *3          | 6 (12.8) *2-4       | 35 (74.5) *2-3-4       | 35 (74.5) *2-3-4       |
|                                            | 02           | 49         | 3 (6.1)             | 0 (0.0)        | 0 (0.0)        | 3 (6.1)              | 19 (38.8)             | 18 (36.7) *3-4        | 0 (0.0) *1          | 25 (51.0) *3           | 25 (51.0) *3           |
|                                            | 03           | 50         | 0 (0.0)             | 0 (0.0)        | 0 (0.0)        | 0 (0.0)              | 11 (22.0)             | 7 (14.0) *1-2-5       | 0 (0.0) *1          | 12 (24.0) *5           | 12 (24.0) *5           |
|                                            | 04           | 72         | 1 (1.4)             | 0 (0.0)        | 0 (0.0)        | 1 (1.4)              | 20 (27.8)             | 13 (18.1) *2-5        | 1 (1.4) *1          | 27 (37.5)              | 28 (38.9)              |
|                                            | 05           | 29         | 0 (0.0)             | 0 (0.0)        | 0 (0.0)        | 0 (0.0)              | 12 (41.4)             | 13 (44.8) *3-4        | 0 (0.0) *1          | 16 (55.2)              | 16 (55.2)              |
|                                            | <b>Total</b> | <b>247</b> | <b>6 (2.4) *ZAD</b> | <b>0 (0.0)</b> | <b>0 (0.0)</b> | <b>6 (2.4) *ZAD</b>  | <b>94 (38.1) *ZAD</b> | <b>67 (27.1) *MVG</b> | <b>7 (2.8) *ZAD</b> | <b>115 (46.6) *ZAD</b> | <b>116 (47.0) *ZAD</b> |
|                                            | F            | 122        | 1 (0.8)             | 0 (0.0)        | 0 (0.0)        | 1 (0.8)              | 45 (36.9)             | 31 (25.4)             | 2 (1.6)             | 57 (46.7)              | 58 (47.5)              |
|                                            | M            | 125        | 5 (4.0)             | 0 (0.0)        | 0 (0.0)        | 5 (4.0)              | 49 (39.2)             | 36 (28.8)             | 5 (4.0)             | 58 (46.4)              | 58 (46.4)              |
| Mvoun<br><br><br><br><br><br><br><br>(MVG) | 01           | 79         | 3 (3.8)             | 0 (0.0)        | 0 (0.0)        | 3 (3.8)              | 16 (20.3) *2-3-5      | 17 (21.5) *3          | 0 (0.0)             | 25 (31.7) *3-5         | 27 (34.2) *3-5         |
|                                            | 02           | 47         | 2 (4.3)             | 0 (0.0)        | 0 (0.0)        | 2 (4.3)              | 18 (38.3) *3-4        | 8 (17.0) *3           | 3 (6.4)             | 20 (42.6) *3-4         | 21 (44.7) *3-4         |
|                                            | 03           | 76         | 0 (0.0) *5          | 0 (0.0)        | 0 (0.0)        | 0 (0.0)              | 48 (63.2) *4          | 58 (76.3) *1-2-4-5    | 0 (0.0)             | 62 (81.6) *4           | 62 (81.6) *4           |
|                                            | 04           | 12         | 0 (0.0)             | 0 (0.0)        | 0 (0.0)        | 0 (0.0)              | 0 (0.0) *5            | 1 (8.3) *3            | 0 (0.0)             | 1 (8.3) *5             | 1 (8.3) *5             |
|                                            | 05           | 38         | 6 (15.8) *3         | 0 (0.0)        | 0 (0.0)        | 6 (15.8)             | 19 (50.0)             | 13 (34.2) *3          | 0 (0.0)             | 24 (63.2)              | 26 (68.4)              |
|                                            | <b>Total</b> | <b>252</b> | <b>11 (4.4)</b>     | <b>0 (0.0)</b> | <b>0 (0.0)</b> | <b>11 (4.4) *ZAD</b> | <b>101 (40.1)</b>     | <b>97 (38.5)</b>      | <b>3 (1.2)</b>      | <b>132 (52.4)</b>      | <b>137 (54.4)</b>      |

|                |              |            |                |                |                |                |                                          |                                 |                               |                   |                   |
|----------------|--------------|------------|----------------|----------------|----------------|----------------|------------------------------------------|---------------------------------|-------------------------------|-------------------|-------------------|
|                |              |            | <b>*ZAD</b>    |                |                |                | <b>*ZAD</b>                              | <b>*LPE</b>                     |                               | <b>*ZAD</b>       | <b>*ZAD</b>       |
|                | F            | 124        | 4 (3.2)        | 0 (0.0)        | 0 (0.0)        | 4 (3.2)        | 54 (43.5)                                | 40 (32.3)                       | 2 (1.6)                       | 60 (48.4)         | 62 (50.0)         |
|                | M            | 128        | 7 (5.5)        | 0 (0.0)        | 0 (0.0)        | 7 (5.5)        | 47 (36.7)                                | 57 (44.5)                       | 1 (0.8)                       | 72 (56.3)         | 75 (58.6)         |
| Zadié<br>(ZAD) | 01           | 80         | 0 (0.0)        | 0 (0.0)        | 0 (0.0)        | 0 (0.0)        | 42 (52.5)                                | 26 (32.5)                       | 0 (0.0)                       | 50 (62.5)         | 50 (62.5)         |
|                | 02           | 66         | 0 (0.0)        | 0 (0.0)        | 0 (0.0)        | 0 (0.0)        | 41 (62.1)                                | 17 (25.8)                       | 0 (0.0)                       | 43 (65.2)         | 43 (65.2)         |
|                | 03           | 63         | 0 (0.0)        | 0 (0.0)        | 0 (0.0)        | 0 (0.0)        | 33 (52.4)                                | 22 (34.9)                       | 0 (0.0)                       | 44 (69.8)         | 44 (69.8)         |
|                | 04           | 7          | 0 (0.0)        | 0 (0.0)        | 0 (0.0)        | 0 (0.0)        | 5 (71.4)                                 | 3 (42.9)                        | 0 (0.0)                       | 6 (85.7)          | 6 (85.7)          |
|                | 05           | 39         | 0 (0.0)        | 0 (0.0)        | 0 (0.0)        | 0 (0.0)        | 26 (66.7)                                | 14 (35.9)                       | 0 (0.0)                       | 29 (74.4)         | 29 (74.4)         |
|                | <b>Total</b> | <b>255</b> | <b>0 (0.0)</b> | <b>0 (0.0)</b> | <b>0 (0.0)</b> | <b>0 (0.0)</b> | <b>147 (57.6)</b><br><b>*IVD-LPE-MVG</b> | <b>82 (32.2)</b><br><b>*LPE</b> | <b>0 (0.0)</b><br><b>*LPE</b> | <b>172 (67.5)</b> | <b>172 (67.5)</b> |
|                | F            | 125        | 0 (0.0)        | 0 (0.0)        | 0 (0.0)        | 0 (0.0)        | 76 (60.8)                                | 42 (33.6)                       | 0 (0.0)                       | 87 (69.6)         | 87 (69.6)         |
|                | M            | 130        | 0 (0.0)        | 0 (0.0)        | 0 (0.0)        | 0 (0.0)        | 71 (54.6)                                | 40 (30.8)                       | 0 (0.0)                       | 85 (65.4)         | 85 (65.4)         |

\* $p < 0.05$  (Fisher-Exact-test); \* was following by school number or by department name with a significant difference; NS: no significant
