# Supplementary material for: Baseline Mapping of Schistosomiasis and Soil Transmitted Helminthiasis in the Northern and Eastern Health Regions of Gabon, Central Africa:&nbsp; Recommendations for Preventive Chemotherapy
Source: Preprints.org preprint supplement (doi:10.20944/preprints201808.0442.v1), 2018-08-27
Supplement: Supplementary file 3 [file supplementary]

S3 Table

| Département    | Ecole        | Schistosomiasis                  |                   |                      | Soil-Transmitted-Helminthiasis                            |                                       |                                    |
|----------------|--------------|----------------------------------|-------------------|----------------------|-----------------------------------------------------------|---------------------------------------|------------------------------------|
|                |              | <i>S. haematobium</i>            | <i>S. mansoni</i> | <i>S. guineensis</i> | <i>A. lumbricoides</i>                                    | <i>T. trichiura</i>                   | Hookworm                           |
| Woleu<br>(WLE) | 01           | No infection                     | No infection      | No infection         | 13419.0±6426.6 (8) <sup>M</sup>                           | 1654.9±621.4 (22) <sup>M</sup> *2-3-4 | 56.0±8.0 (3) <sup>L</sup>          |
|                | 02           | 22.0 (1) <sup>L</sup>            |                   |                      | 21196.0±7185.6 (12) <sup>M</sup>                          | 758.4±336.2 (20) <sup>L</sup> *1      | 144.0 (1) <sup>L</sup>             |
|                | 03           | No infection                     |                   |                      | 8872.0±2129.1 (3) <sup>M</sup> *5                         | 276.0±104.7 (14) <sup>L</sup> *1      | No infection                       |
|                | 04           | No infection                     |                   |                      | 11048.0±2440.3 (3) <sup>M</sup>                           | 507.0±173.0 (16) <sup>L</sup> *1      | 240.0±148.0 (4) <sup>L</sup>       |
|                | 05           | 1.0 (1) <sup>L</sup>             |                   |                      | 17712.0±3194.8 (6) <sup>M</sup> *3                        | 1155.3±286.4 (29) <sup>M</sup>        | 92.6±24.8 (7) <sup>L</sup>         |
|                | <b>Total</b> | <b>11.5±10.5 (2)<sup>L</sup></b> |                   |                      | <b>16491.8±3194.8 (32)<sup>M</sup></b><br><b>*HKO-OKO</b> | <b>961.0±961.0 (101)<sup>L</sup></b>  | <b>128.0±41.6 (15)<sup>L</sup></b> |
|                | F            | 1.0 (1) <sup>L</sup>             |                   |                      | 6850.0±1642.7 (12) <sup>M</sup> *                         | 648.0±130.3 (49) <sup>L</sup>         | 80.0±32.0 (3) <sup>L</sup>         |
|                | M            | 22.0 (1) <sup>L</sup>            |                   |                      | 22276.8±4583.7 (20) <sup>M</sup>                          | 1255.9±319.2 (52) <sup>M</sup>        | 140.0±51.4 (12) <sup>L</sup>       |
| Ntem<br>(NTM)  | 01           | No infection                     | No infection      | No infection         | 15690.0±4270.9 (16) <sup>M</sup>                          | 2388.6±475.9 (19) <sup>M</sup> *4     | No infection                       |
|                | 02           | No infection                     | No infection      |                      | 60500.6±30103.5 (7) <sup>M</sup>                          | 6016.0±1944.1 (15) <sup>M</sup>       | No infection                       |
|                | 03           | No infection                     | No infection      |                      | 12268.8±5744.5 (5) <sup>M</sup>                           | 1592.7±870.5 (11) <sup>M</sup>        | 216.0 (1) <sup>L</sup>             |
|                | 04           | 10.7±5.8 (3) <sup>L</sup>        | 72.0 (1)          |                      | 9156.0±3811.9 (22) <sup>M</sup>                           | 1263.1±471.6 (54) <sup>M</sup> *1-5   | 96.0 (1) <sup>L</sup>              |
|                | 05           | 28.0±25.5 (3) <sup>L</sup>       | No infection      |                      | 8554.8±3929.9 (20) <sup>M</sup>                           | 3221.7±837.8 (34) <sup>M</sup> *4     | 240.0 (1) <sup>L</sup>             |
|                | <b>Total</b> | <b>19.3±12.3 (6)<sup>L</sup></b> | <b>72.0 (1)</b>   |                      | <b>15834.5±3854.3 (70)<sup>M</sup></b>                    | <b>2487.9±390.3 (133)<sup>M</sup></b> | <b>184.0±44.5 (3)<sup>L</sup></b>  |

|                    |              |                                |              |              |                                                            |                                            |                                  |
|--------------------|--------------|--------------------------------|--------------|--------------|------------------------------------------------------------|--------------------------------------------|----------------------------------|
|                    |              |                                |              |              | <b>*OKO</b>                                                | <b>*HKO-OKO</b>                            |                                  |
|                    | F            | 22.8±18.9 (4) <sup>L</sup>     | No infection |              | 22810.9±7596.7 (33) <sup>M</sup>                           | 2612.2±577.9 (63) <sup>M</sup>             | 96.0 (1) <sup>L</sup>            |
|                    | M            | 12.5±8.5 (2) <sup>L</sup>      | 72.0 (1)     |              | 9612.3±2415.4 (37) <sup>M</sup>                            | 2376.0±532.0 (70) <sup>M</sup>             | 228.0±12.0 (2) <sup>L</sup>      |
| Haut-Ntem<br>(HNT) | 01           | 1.0 (1)                        | No infection | No infection | 15929.7±4628.7 (23) <sup>M</sup><br>*5                     | 3409.6±1302.0 (30) <sup>M</sup> *4-5       | No infection                     |
|                    | 02           | No infection                   |              |              | 12436.4±2771.9 (33) <sup>M</sup><br>*5                     | 1803.2±317.4 (45) <sup>M</sup> *4-5        | 36.0±12.0 (2) <sup>L</sup>       |
|                    | 03           | 13.0 (1) <sup>L</sup>          |              |              | 12953.3±4315.6 (18) <sup>M</sup>                           | 1465.7±678.8 (29) <sup>M</sup>             | No infection                     |
|                    | 04           | No infection                   |              |              | 15150.7±5797.3 (18) <sup>M</sup>                           | 655.7±215.2 (28) <sup>L</sup> *1-2         | No infection                     |
|                    | 05           | No infection                   |              |              | 3288.0±1303.1 (12) <sup>L</sup> *1-2                       | 370.1±84.9 (19) <sup>L</sup> *1-2          | No infection                     |
|                    | <b>Total</b> | <b>7.0±6.0 (2)<sup>L</sup></b> |              |              | <b>12712.6±1847.9 (104)<sup>M</sup></b><br><b>*HKO-OKO</b> | <b>1664.4±314.4 (151)<sup>M</sup> *OKO</b> | <b>72.0±48.0 (2)<sup>L</sup></b> |
|                    | F            | 1.0 (1) <sup>L</sup>           |              |              | 13805.2±3028.8 (46) <sup>M</sup>                           | 1244.4±408.8 (74) <sup>M</sup> *           | 24.0 (1) <sup>L</sup>            |
|                    | M            | 13.0 (1) <sup>L</sup>          |              |              | 11846.1±2300.0 (58) <sup>M</sup>                           | 2068.1±473.4 (77) <sup>M</sup>             | 120.0 (1) <sup>L</sup>           |
| Haut-Komo<br>(HKO) | 01           | 82.0±47.0 (2) <sup>L</sup>     | No infection | 240.0 (1)    | 6800.0±1442.1 (45) <sup>M</sup>                            | 960.0±243.9 (62) <sup>L</sup>              | No infection                     |
|                    | 02           | 1.0 (1) <sup>L</sup>           |              | No infection | 9201.0±4666.2 (16) <sup>M</sup>                            | 656.8±196.9 (30) <sup>L</sup>              |                                  |
|                    | 03           | No infection                   |              | No infection | 9801.0±3625.8 (8) <sup>M</sup>                             | 2448.0±1829.5 (14) <sup>M</sup>            |                                  |
|                    | 04           | No infection                   |              | No infection | 15097.6±4754.4 (15) <sup>M</sup>                           | 1408.0±519.4 (24) <sup>M</sup>             |                                  |

|                 |              |                                  |              |                  |                                                              |                                               |                       |
|-----------------|--------------|----------------------------------|--------------|------------------|--------------------------------------------------------------|-----------------------------------------------|-----------------------|
|                 | 05           | 1.0 (1) <sup>L</sup>             |              | No infection     | 4903.6±1626.0 (22) <sup>L</sup>                              | 693.2±199.3 (26) <sup>L</sup>                 |                       |
|                 | <b>Total</b> | <b>33.4±24.8 (5)<sup>L</sup></b> |              | <b>240.0 (1)</b> | <b>8169.5±1240.4 (106)<sup>M</sup></b><br><b>*WLE-HTN</b>    | <b>1059.7 ±211.5 (156)<sup>M</sup> *NTM</b>   |                       |
|                 | F            | 1.0 (1) <sup>L</sup>             |              | 240.0 (1)        | 7919.6±1736.9 (60) <sup>M</sup>                              | 1013.5±209.2 (88) <sup>M</sup>                |                       |
|                 | M            | 41.5±30.3 (4) <sup>L</sup>       |              | No infection     | 8495.5±1763.5 (46) <sup>M</sup>                              | 1119.5±404.6 (68) <sup>M</sup>                |                       |
| Okano<br>(OKO)  | 01           | 7.0 (1) <sup>L</sup>             | No infection | No infection     | 2905.5±1354.5 (16) <sup>L</sup> *3                           | 747.2±272.1 (53) <sup>L</sup>                 | No infection          |
|                 | 02           | No infection                     |              |                  | 6758.0±3181.4 (12) <sup>M</sup>                              | 526.9±114.3 (22) <sup>L</sup>                 |                       |
|                 | 03           | No infection                     |              |                  | 11496.0±4512.2 (6) <sup>M</sup> *1-4                         | 413.7±123.1 (17) <sup>L</sup>                 |                       |
|                 | 04           | 1.0 (1) <sup>L</sup>             |              |                  | 1627.2±680.4 (10) <sup>L</sup> *3                            | 356.0±99.4 (12) <sup>L</sup>                  |                       |
|                 | 05           | 2.0 (1) <sup>L</sup>             |              |                  | 12240.0±9369.3 (14) <sup>M</sup>                             | 228.0±86.8 (8) <sup>L</sup>                   |                       |
|                 | <b>Total</b> | <b>3.3±1.9 (3)</b>               |              |                  | <b>5454.0±1357.3 (48)<sup>M</sup></b><br><b>*WLE-NTM-HNT</b> | <b>574.3±132.9 (112)<sup>L</sup> *NTM-HNT</b> |                       |
|                 | F            | 1.5±0.5 (2) <sup>L</sup>         |              |                  | 5402.7±2200.8 (18) <sup>M</sup>                              | 603.5±194.5 (55) <sup>L</sup>                 |                       |
|                 | M            | 7.0 (1) <sup>L</sup>             |              |                  | 5484.8±1753.2 (30) <sup>M</sup>                              | 546.1±183.2 (57) <sup>L</sup>                 |                       |
| Ivindo<br>(IVD) | 01           | 35.0 (1) <sup>L</sup>            | No infection | No infection     | 6189.3±3563.2 (9) <sup>M</sup>                               | 977.1±794.2 (14) <sup>L</sup> *3-4            | No infection          |
|                 | 02           | No infection                     |              |                  | 9994.7±3365.4 (18) <sup>M</sup>                              | 144.0±39.9 (16) <sup>L</sup> *3-4-5           | 24.0 (1) <sup>L</sup> |
|                 | 03           | 176.0 (1) <sup>H</sup>           |              |                  | 6890.1±1456.5 (23) <sup>M</sup> *5                           | 931.0±404.5 (19) <sup>L</sup><br>*1-2-4       | No infection          |

|               |              |                                    |              |              |                                                          |                                                           |                                  |
|---------------|--------------|------------------------------------|--------------|--------------|----------------------------------------------------------|-----------------------------------------------------------|----------------------------------|
|               | 04           | No infection                       |              |              | 10142.4±2166.3 (40) <sup>L</sup> *5                      | 365.4±75.3 (31) <sup>L</sup> *1-2-3                       | No infection                     |
|               | 05           | No infection                       |              |              | 891.4±412.5 (7) <sup>L</sup> *3-4                        | 768.0±480.8 (3) <sup>L</sup> *2                           | 48.0 (1) <sup>L</sup>            |
|               | <b>Total</b> | <b>105.5±70.5 (2)</b>              |              |              | <b>8309.4±1201.3 (97)<sup>M</sup></b><br><b>*MVG-ZAD</b> | <b>569.9±165.7 (83)<sup>L</sup> *LPE-ZAD</b>              | <b>36.0±12.0 (2)<sup>L</sup></b> |
|               | F            | 35.0 (1) <sup>L</sup>              |              |              | 8007.6±1892.3 (37) <sup>M</sup>                          | 758.3±404.9 (32) <sup>L</sup> *                           | 36.0 ± 12.0 (2) <sup>L</sup>     |
|               | M            | 176.2 (1) <sup>H</sup>             |              |              | 8495.6±1564.4 (60) <sup>M</sup>                          | 451.8±93.7 (51) <sup>L</sup>                              | No infection                     |
| Lopé<br>(LPE) | 01           | 290.0±276.0 (2) <sup>H</sup>       | No infection | No infection | 9682.5±2957.7 (32) <sup>M</sup>                          | 184.5±91.5 (16) <sup>L</sup> *3                           | 88.0±55.0 (6) <sup>L</sup>       |
|               | 02           | 512.7±510.7 (3) <sup>H</sup>       |              |              | 12411.8±5354.7 (19) <sup>M</sup>                         | 192.0±42.9 (18) <sup>L</sup>                              | No infection                     |
|               | 03           | No infection                       |              |              | 11199.3±4497.8 (11) <sup>M</sup> *5                      | 363.4±85.2 (7) <sup>L</sup> *1-5                          | No infection                     |
|               | 04           | 400.0 (1) <sup>H</sup>             |              |              | 7153.2±2525.3 (20) <sup>M</sup>                          | 275.1±79.7 (13) <sup>L</sup>                              | 168.0 (1) <sup>L</sup>           |
|               | 05           | No infection                       |              |              | 1952.0±818.4 (12) <sup>M</sup> *3                        | 195.7±90.5 (13) <sup>L</sup> *3                           | No infection                     |
|               | <b>Total</b> | <b>419.7±243.4 (6)<sup>H</sup></b> |              |              | <b>8886.6±1662.9 (94)<sup>M</sup></b>                    | <b>225.0±34.8 (67)<sup>L</sup></b><br><b>*IVD-MVG-ZAD</b> | <b>99.4±47.8 (7)<sup>L</sup></b> |
|               | F            | 400.0 (1) <sup>H</sup>             |              |              | 7248.0±2026.4 (45) <sup>M</sup>                          | 163.4±208.7 (31) <sup>L</sup>                             | 264.0±96.0 (2) <sup>L</sup>      |
|               | M            | 423.6±298.0 (5) <sup>H</sup>       |              |              | 10391.5±2592.8 (49) <sup>M</sup>                         | 278.0±331.3 (36) <sup>L</sup>                             | 33.6±9.6 (5) <sup>L</sup>        |
| Mvoun (MVG)   | 01           | 84.0±77.1 (3) <sup>L</sup>         | No infection | No infection | 1576.5±500.6 (16) <sup>M</sup> *3                        | 341.7±119.7 (17) <sup>L</sup> *3                          | No infection                     |
|               | 02           | 60.5±52.5 (2) <sup>L</sup>         |              |              | 13016.0±6773.9 (18) <sup>M</sup>                         | 2304.0± 1743.2 (8) <sup>M</sup>                           | 5464.0±5190.0 (3) <sup>H</sup>   |
|               | 03           | No infection                       |              |              | 6831.0±1397.8 (48) <sup>M</sup> *1                       | 1603.5±654.1 (58) <sup>M</sup> *1-5                       | No infection                     |
|               | 04           | No infection                       |              |              | No infection                                             | 24.0 (1) <sup>L</sup>                                     | No infection                     |

|                |              |                                   |              |              |                                                        |                                                           |                                      |
|----------------|--------------|-----------------------------------|--------------|--------------|--------------------------------------------------------|-----------------------------------------------------------|--------------------------------------|
|                | 05           | 56.5±37.9 (6) <sup>L</sup>        |              |              | 12240.0±5886.9 (19) <sup>M</sup>                       | 1296.0± 1118.9 (13) <sup>M</sup> *3                       | No infection                         |
|                | <b>Total</b> | <b>64.7±27.9 (11)<sup>L</sup></b> |              |              | <b>8118.4±1776.6 (101)<sup>M</sup></b><br><b>*IVD</b>  | <b>1382.6±441.4 (97)<sup>M</sup> *LPE-ZAD</b>             | <b>5464.0±5190.0 (3)<sup>L</sup></b> |
|                | F            | 91.5±54.8 (4) <sup>L</sup>        |              |              | 10431.6±3116.2 (54) <sup>M</sup>                       | 2368.8±1038.8 (40) <sup>M</sup>                           | 528.0 (1) <sup>L</sup>               |
|                | M            | 49.4±32.8 (7) <sup>L</sup>        |              |              | 5460.8±1266.3 (47) <sup>M</sup>                        | 690.5±141.9 (57) <sup>L</sup>                             | 7932.0±7908.0 (2) <sup>L</sup>       |
| Zadié<br>(ZAD) | 01           | No infection                      | No infection | No infection | 4144.6±993.0 (42) <sup>L</sup> *2-5                    | 231.7±164.6 (26) <sup>L</sup>                             | No infection                         |
|                | 02           |                                   |              |              | 13638.4±3425.6 (41) <sup>L</sup> *1-3                  | 108.7±31.9 (17) <sup>L</sup>                              |                                      |
|                | 03           |                                   |              |              | 4252.4±1111.13 (33) <sup>L</sup> *2                    | 132.0 ±61.8 (22) <sup>L</sup>                             |                                      |
|                | 04           |                                   |              |              | 8462.4±4497.6 (5) <sup>M</sup>                         | 992.0 ± 944.0 (3) <sup>L</sup>                            |                                      |
|                | 05           |                                   |              |              | 6397.9±1412.9 (26) <sup>M</sup> *1                     | 90.9±23.9 (14) <sup>L</sup>                               |                                      |
|                | <b>Total</b> |                                   |              |              | <b>7362.1± 1108.0 (147)<sup>M</sup></b><br><b>*IVD</b> | <b>183.2±64.2 (82)<sup>L</sup></b><br><b>*IVD-LPE-MVG</b> |                                      |
|                | F            |                                   |              |              | 8313.8±1855.1 (76) <sup>M</sup>                        | 272.6±120.3 (42) <sup>L</sup>                             |                                      |
|                | M            |                                   |              |              | 6343.4±1151.4 (71) <sup>M</sup>                        | 89.4±33.8 (40) <sup>L</sup>                               |                                      |
|                |              |                                   |              |              |                                                        |                                                           |                                      |
